# Supplementary material
Source: PubMed Central journal article supplement (PMC3941923)
Supplement: Supp_Fig1.pdf [file Supp_Fig1.pdf]

## Supplementary Data

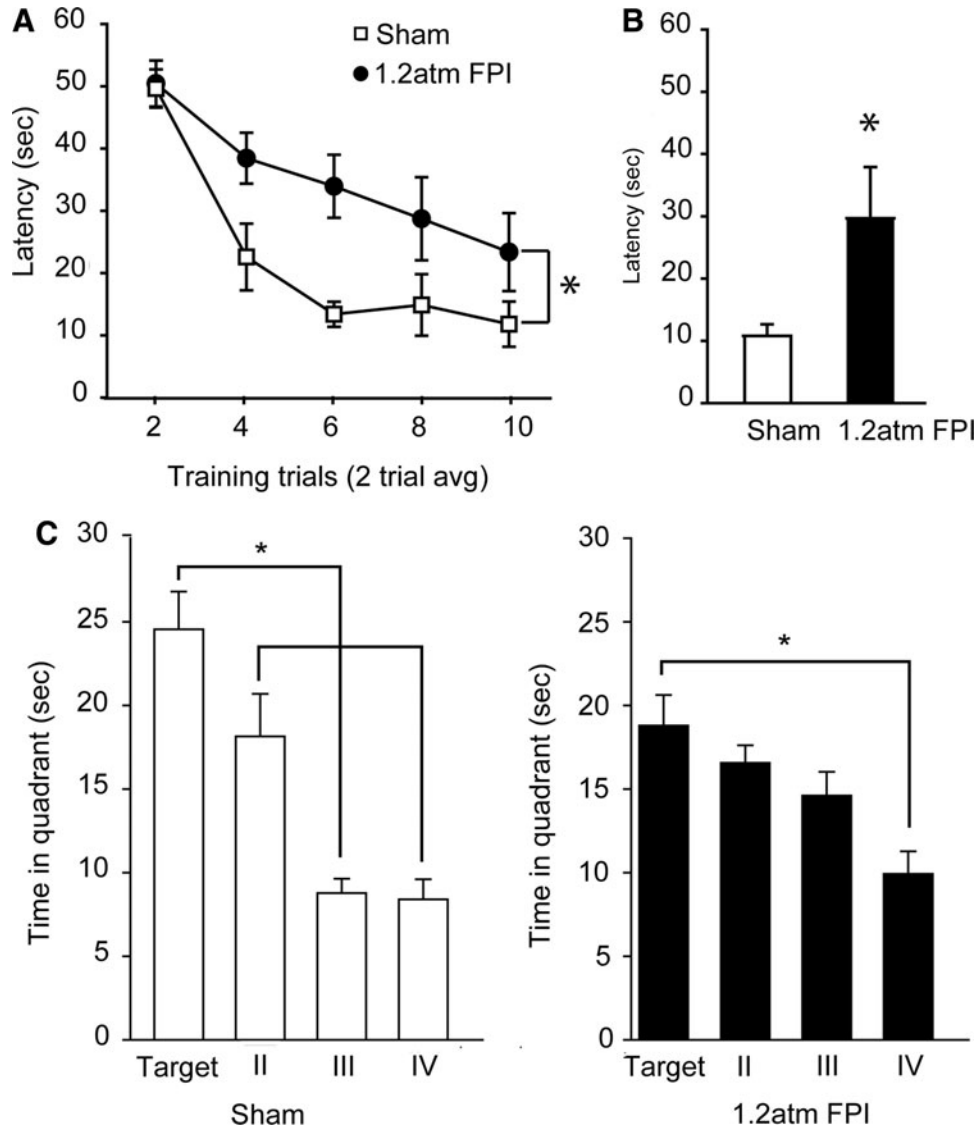

**SUPPLEMENTARY FIG. S1.** (A) Acquisition curves from sham-operated ( $n=10$ ) and 1.2 atm FPI animals ( $n=10$ ) trained in the abbreviated Morris water maze task on day 3 post-injury indicating that 1.2 atm caused spatial learning dysfunction acutely after injury. 1.2 atm FPI animals had poor short-term memory as indicated by (B) longer latencies to cross the platform location and (C) poor quadrant preference in a probe trial given 30 min after training. Data are presented as the mean  $\pm$  SEM;  $*p < 0.05$ .
